# Supplementary material
Source: publisher site journal article supplement (https://www.dovepress.com/article/599941)
Supplement: Supplementary file 1 [file 599941%20Revised%20Supplementary%20Tables%20S1-S6.docx]

**Supplementary Table S1. Primer sequences used in RT-qPCR.**

| **Gene** | **Primer sequence (5′→ 3′)** |
| --- | --- |
| *Aggrecan* | F: TCCTGGTGTGGCTGCTGTCC  R: TCTGGCTCGGTGGTGAACTCTAG |
| *Col2a1* | F: GGAGCAGCAAGAGCAAGGAGAAG  R: TGGACAGCAGGCGTAGGAAGG |
| *TNFα* | F: CTTCCAGCTGGAGAAGGGTG  R: CCCAAAGTAGACCTGCCCAG |
| *IL-1β* | F: CCACCTCCAGGGACAGGATA  R: TCAACACGCAGGACAGGTAC |
| *iNOS* | F: GGGTGGAAGCGGTAACAAAGGAG  R: CCTGCTTGGTGGCGAAGATGAG |
| *MMP13* | F: GCGGGAATCCTGAAGGAGAATGC  R: ATCGTCAAGTTTGCCAGTCACCTC |
| *IL-6* | F: GTGTTGCCTGCTGCCTTCC  R: TCTGAAGAGGTGAGTGGCTGTC |
| *ADAMTS5* | F: CCCGAAGAACTCCCAGGACAG  R: ACCACAGGCGAGCACAGAC |
| *Notch1* | F: TGCGAGACCAACATCAACGAGTG  R: TCAGGCAGAAGCAGAGGTAGGC |
| *Jagged1* | F: TGTGGCTTGGATCTGTTGCTTGG  R: ACGTTGTTGGTGGTGTTGTCCTC |
| *Gucy1a3* | F: TGCACGAAGCTCAAGGATCTCAAG  R: TCCTGCTGCCTCCTCTGAAGAC |

**Supplementary Table S2: Bootstrap 95% Confidence Intervals for Fig.1** **data (n=3)**

| **Assay** | **Comparison** | **Mean Difference** | **Bootstrap 95% CI (Percentile)** | **Significance**  **(*P*<0.05)** |
| --- | --- | --- | --- | --- |
| Jagged1 (Fig.1B) | CON *vs* 0.5mM SNP | -0.1869 | [ -0.2919, -0.1020 ] | Yes (*) |
| Notch1 (Fig.1B) | CON *vs* 0.5mM SNP | -0.3336 | [ -0.4069, -0.2798 ] | Yes (*) |
| iNOS (Fig.1B) | CON *vs* 0.5mM SNP | -0.2243 | [ -0.3568, -0.1138 ] | Yes (*) |
| Gucy1a3 (Fig.1B) | CON *vs* 0.5mM SNP | -0.4374 | [ -0.6263, -0.3062 ] | Yes (*) |
| Notch1 (Fig.1D) | CON *vs* SNP | -0.3722 | [ -0.4350, -0.2958 ] | Yes (*) |
| SNP *vs* SNP+DAPT | 0.6518 | [ 0.5831, 0.7376 ] | Yes (#) |
| Jagged1 (Fig.1E) | CON *vs* SNP | -0.3653 | [ -0.5394, -0.1910 ] | Yes (*) |
| SNP *vs* SNP+DAPT | 0.4977 | [ 0.3238, 0.6559 ] | Yes (#) |
| TNFα (Fig.1F) | CON *vs* SNP | -0.8806 | [ -1.2501, -0.5471 ] | Yes (*) |
| SNP *vs* SNP+DAPT | 0.8832 | [ 0.4519, 1.3208 ] | Yes (#) |
| Gucy1a3 (Fig.1G) | CON *vs* SNP | -0.3538 | [ -0.5467, -0.1137 ] | Yes (*) |
| SNP *vs* SNP+DAPT | 0.1795 | [ 0.0234, 0.3319 ] | Yes (#) |
| Aggrecan (Fig.1H) | CON *vs* SNP | 0.1124 | [ 0.0194, 0.1753 ] | Yes (*) |
| SNP *vs* SNP+DAPT | -0.3142 | [ -0.3876, -0.2183 ] | Yes (#) |
| Col2a1 (Fig.1 I) | CON *vs* SNP | 0.0831 | [ -0.0445, 0.1750 ] | No (ns) |
| SNP *vs* SNP+DAPT | -0.2900 | [ -0.3828, -0.1670 ] | Yes (#) |
| iNOS (Fig.1J) | CON *vs* SNP | -0.5102 | [ -0.6243, -0.4194 ] | Yes (*) |
| SNP *vs* SNP+DAPT | 0.1644 | [ 0.0774, 0.2662 ] | Yes (#) |
| MMP13 (Fig.1K) | CON *vs* SNP | -0.1890 | [ -0.2933, -0.1012 ] | Yes (*) |
| SNP *vs* SNP+DAPT | 0.2318 | [ 0.1445, 0.3278 ] | Yes (#) |
| IL-1β (Fig.1L) | CON *vs* SNP | -6.9685 | [ -7.8007, -6.4007 ] | Yes (*) |
| SNP *vs* SNP+DAPT | 6.2662 | [ 5.6360, 7.0717 ] | Yes (#) |

* and # represent significant differences between the specific pairs of groups evaluated in the "Comparison" column (**P* < 0.05 *vs* CON; #*P* < 0.05 *vs* SNP+DAPT).

"ns" indicates no statistically significant difference.

**Supplementary Table S3: Bootstrap 95% Confidence Intervals for Fig.2 data (n=3)**

| **Assay** | **Comparison** | | **Mean Difference** | **Bootstrap 95% CI (Percentile)** | **Significance**  **(*P*<0.05)** |
| --- | --- | --- | --- | --- | --- |
| ACAN (Fig.2A) | | Control *vs* DAPT | -0.2836 | [ -0.3385, -0.2334 ] | Yes (*) |
| Collagen II (Fig.2A) | | Control *vs* DAPT | -0.4101 | [ -0.6862, -0.1857 ] | Yes (*) |
| Gucy1a3 (Fig.2A) | | Control *vs* DAPT | 0.2397 | [ 0.1274, 0.3854 ] | Yes (*) |
| Aggrecan (Fig.2B) | | Control *vs* DAPT | -0.6306 | [ -0.7163, -0.4942 ] | Yes (*) |
| Col2a1 (Fig.2B) | | Control *vs* DAPT | -0.6910 | [ -1.066, -0.2918 ] | Yes (*) |
| Gucy1a3 (Fig.2B) | Control *vs* DAPT | | 4.3982 | [ 4.2256, 4.6422 ] | Yes (*) |
| iNOS (Fig.2B) | Control *vs* DAPT | | 5.1633 | [ 4.9997, 5.3082 ] | Yes (*) |
| MMP13 (Fig.2B) | Control *vs* DAPT | | 4.9566 | [ 2.9746, 6.3546 ] | Yes (*) |

* represent significant differences between the specific pairs of groups evaluated in the "Comparison" column (**P* < 0.05 *vs* DAPT).

**Supplementary Table S4: Bootstrap 95% Confidence Intervals for Fig.4 (A+B) data (n=3)**

| **Assay** | **Comparison** | **Mean Difference** | **Bootstrap 95% CI (Percentile)** | **Significance**  **(*P*<0.05)** |
| --- | --- | --- | --- | --- |
| NC *vs* Gucy1a3(-)-H-1201 (Fig.4A) | | 0.4941 | [ 0.3891, 0.6413 ] | Yes (*) |
| NC *vs* Gucy1a3(-)-H-2339 (Fig.4A) | | 0.2056 | [ 0.1257, 0.2806 ] | Yes (*) |
| NC *vs* Gucy1a3(-)-H-1545 (Fig.4A) | | 0.7400 | [ 0.6595, 0.8356 ] | Yes (*) |
| NC *vs* Gucy1a3(-)-H-1599 (Fig.4A) | | 0.3074 | [ 0.2046, 0.4234 ] | Yes (*) |
| Jagged1 (Fig.4B) | NC *vs* Gucy1a3(-)-H-1545 | 0.2359 | [ 0.1095, 0.3506 ] | Yes (*) |
| Notch1 (Fig.4B) | NC *vs* Gucy1a3(-)-H-1545 | 0.2891 | [ 0.1553, 0.4327 ] | Yes (*) |
| iNOS (Fig.4B) | NC *vs* Gucy1a3(-)-H-1545 | 0.4820 | [ 0.3596, 0.5907 ] | Yes (*) |
| Gucy1a3 (Fig.4B) | NC *vs* Gucy1a3(-)-H-1545 | 0.4058 | [ 0.2616, 0.5737 ] | Yes (*) |

* represent significant differences between the specific pairs of groups evaluated in the "Comparison" column (**P* < 0.05 *vs* NC).

**Supplementary Table S5: Bootstrap 95% Confidence Intervals for Fig.4 (C+D) data (n=3)**

| **Assay** | **Comparison** | **Mean Difference** | **Bootstrap 95% CI (Percentile)** | **Significance**  **(*P*<0.05)** |
| --- | --- | --- | --- | --- |
| Gucy1a3 (Fig.4C) | NC *vs* SNP | -0.4930 | [ -0.6314, -0.3104 ] | Yes (*) |
| NC *vs* Gucy1a3(-) | 0.2603 | [ 0.1509, 0.3599 ] | Yes (*) |
| SNP + Gucy1a3(-) *vs* Gucy1a3(-) | 0.5178 | [ 0.3408, 0.6848 ] | Yes (#) |
| SNP + Gucy1a3(-) *vs* SNP | -0.2355 | [ -0.4284, -0.0564 ] | Yes (#) |
| Notch1 (Fig.4C) | NC *vs* SNP | -5.4408 | [ -7.1447, -3.8156 ] | Yes (*) |
| NC *vs* Gucy1a3(-) | 0.0543 | [ -0.2816, 0.2762 ] | No (ns) |
| SNP + Gucy1a3(-) *vs* Gucy1a3(-) | 3.3986 | [ 2.2750, 4.6231 ] | Yes (#) |
| SNP + Gucy1a3(-) *vs SNP* | -2.0965 | [ -3.9900, -0.1652 ] | Yes (#) |
| IL-6 (Fig.4C) | NC *vs* SNP | -0.3973 | [ -0.5057, -0.2683 ] | Yes (*) |
| NC *vs* Gucy1a3(-) | 0.7555 | [ 0.6587, 0.8848 ] | Yes (*) |
| SNP + Gucy1a3(-) *vs* Gucy1a3(-) | 0.3270 | [ 0.2784, 0.3848 ] | Yes (#) |
| SNP + Gucy1a3(-) *vs* SNP | -0.8258 | [ -0.8893, -0.7616 ] | Yes (#) |
| ADAMTS5 (Fig.4C) | NC *vs* SNP | -0.8713 | [ -1.2799, -0.5202 ] | Yes (*) |
| NC *vs* Gucy1a3(-) | 0.6927 | [ 0.4474, 0.8770 ] | Yes (*) |
| SNP + Gucy1a3(-) *vs* Gucy1a3(-) | 0.8646 | [ 0.7104, 0.9986 ] | Yes (#) |
| SNP + Gucy1a3(-) *vs* SNP | -0.6994 | [ -1.0588, -0.3243 ] | Yes (#) |
| ACAN (Fig.4D) | NC *vs* SNP | 0.4891 | [ 0.3141, 0.6191 ] | Yes (*) |
| NC *vs* Gucy1a3(-) | -0.0791 | [ -0.3141, 0.2003 ] | No (ns) |
| SNP + Gucy1a3(-) *vs* Gucy1a3(-) | -0.5830 | [ -0.8030, -0.3199 ] | Yes (#) |
| SNP + Gucy1a3(-) *vs* SNP | -0.014 | [ -0.1429, 0.1135 ] | No (ns) |
| Collagen II (Fig.4D) | NC *vs* SNP | 0.3577 | [ 0.2488, 0.4762 ] | Yes (*) |
| NC *vs* Gucy1a3(-) | 0.0350 | [ -0.1257, 0.1968 ] | No (ns) |
| SNP + Gucy1a3(-) *vs* Gucy1a3(-) | -0.3969 | [ -0.5784, -0.1738 ] | Yes (#) |
| SNP + Gucy1a3(-) *vs* SNP | -0.0742 | [ -0.2044, 0.0992 ] | No (ns) |

* and # represent significant differences between the specific pairs of groups evaluated in the "Comparison" column [**P* < 0.05 *vs* NC; #*P* < 0.05 *vs* SNP + Gucy1a3(-)].

"ns" indicates no statistically significant difference.

**Supplementary Table S6: Bootstrap 95% Confidence Intervals for Fig.4E data (n=3)**

| **Assay** | **Comparison** | **Mean Difference** | **Bootstrap 95% CI (Percentile)** | **Significance**  **(*P*<0.05)** |
| --- | --- | --- | --- | --- |
| Gucy1a3 (Fig.4E) | NC *vs* Gucy1a3(-) | 0.4838 | [ 0.4053, 0.5680 ] | Yes (*) |
| Gucy1a3(-) *vs* Gucy1a3(-) + SNP | -0.2313 | [ -0.3115, -0.1720 ] | Yes (#) |
| Gucy1a3(-) + SNP *vs*  Gucy1a3(-) + SNP + DAPT | 0.2083 | [ 0.1030, 0.3193 ] | Yes (▲) |
| Notch1 (Fig.4E) | NC *vs* Gucy1a3(-) | 0.3393 | [ 0.2499, 0.4571 ] | Yes (*) |
| Gucy1a3(-) *vs* Gucy1a3(-) + SNP | -0.2622 | [ -0.3841, -0.1509 ] | Yes (#) |
| Gucy1a3(-) + SNP *vs*  Gucy1a3(-) + SNP + DAPT | 0.1427 | [ 0.0756, 0.2017 ] | Yes (▲) |
| Jagged1 (Fig.4E) | NC *vs* Gucy1a3(-) | 0.2872 | [ 0.1321, 0.4215 ] | Yes (*) |
| Gucy1a3(-) *vs* Gucy1a3(-) + SNP | -0.3837 | [ -0.5789, -0.1983 ] | Yes (#) |
| Gucy1a3(-) + SNP *vs*  Gucy1a3(-) + SNP + DAPT | 0.2770 | [ 0.1477, 0.4329 ] | Yes (▲) |
| iNOS (Fig.4E) | NC *vs* Gucy1a3(-) | 0.3955 | [ 0.2909, 0.4844 ] | Yes (*) |
| Gucy1a3(-) *vs* Gucy1a3(-) + SNP | -0.2407 | [ -0.3183, -0.1351 ] | Yes (#) |
| Gucy1a3(-) + SNP *vs*  Gucy1a3(-) + SNP + DAPT | 0.1586 | [ 0.0344, 0.2569 ] | Yes (▲) |

*, #, and ▲ represent significant differences between the specific pairs of groups evaluated in the "Comparison" column (**P* < 0.05 *vs* Gucy1a3(-); #*P* < 0.05 *vs* Gucy1a3(-) + SNP; ▲*P* < 0.05 *vs* Gucy1a3(-) + SNP + DAPT).
